# Supplementary material for: Multifunctional Properties of a Bacillus thuringiensis Strain (BST-122): Beyond the Parasporal Crystal
Source: MDPI journal article supplement (doi:10.3390/toxins14110768), 2022-11-07
Supplement: s1 [file s1]

## Article

# Multifunctional Properties of a *Bacillus thuringiensis* Strain (BST-122): Beyond the Paraspore Crystal

Argine Unzue, Carlos J. Caballero, Maite Villanueva, Ana Beatriz Fernández and Primitivo Caballero

## A

Compound name: b-EXO  
Correlation coefficient:  $r = 0.993281$ ,  $r^2 = 0.986608$   
Calibration curve:  $1032.88 * x + 18238.3$   
Response type: External Std, Area  
Curve type: Linear, Origin: Exclude, Weighting:  $1/x$ , Axis trans: None

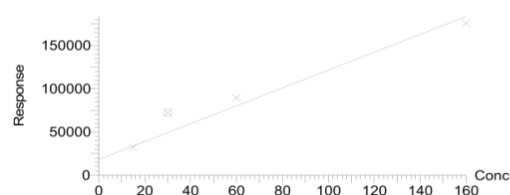

## B

Name: 20181121A9, Date: 21-Nov-2018, Time: 11:06:37, ID: , Description: BT-2

b-EXO

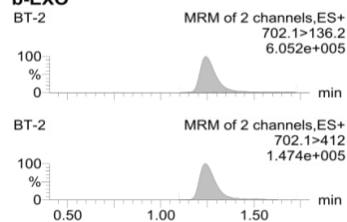

| # | Name    | Sample Text | Trace       | RT   | Area      | Response  | Conc.   |
|---|---------|-------------|-------------|------|-----------|-----------|---------|
| 1 | 1 b-EXO | BT-2        | 702.1>136.2 | 1.24 | 61285.598 | 61285.598 | 41.6769 |

## C

Name: 20181121A15, Date: 21-Nov-2018, Time: 12:13:48, ID: , Description: BT-8

b-EXO

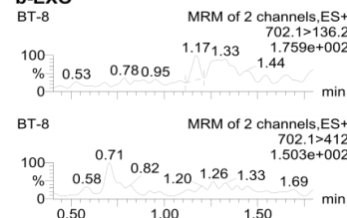

| # | Name    | Sample Text | Trace       | RT | Area | Response | Conc. |
|---|---------|-------------|-------------|----|------|----------|-------|
| 1 | 1 b-EXO | BT-8        | 702.1>136.2 |    |      |          |       |

**Figure S1.** Results of HPLC analysis for detection of production of type I  $\beta$ -exotoxin (thuringiensin). (A): Calibration curve of HPLC analysis, \* multiplication symbol; (B): HD-2 strain standard results (positive control); (C): BST-122 results.

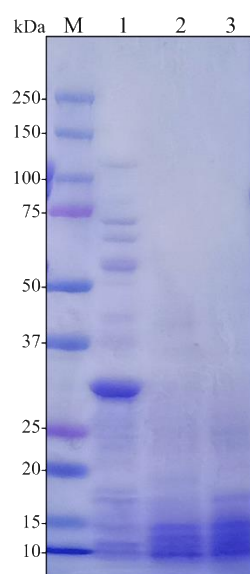

**Figure S2.** SDS-PAGE from BST-122 strain. M: protein weight marker (kDa); 1: spores and crystal mixture; 2: solubilized in carbonate buffer (pH 11.3); 3: solubilized protein dialyzed in HEPES (pH 8.0).

**Table S1.** Mean lethal concentration (LC<sub>50</sub>) value of the BST-122 solubilized protein crystals for J2 *M. incognita* individuals.

| LC               | Concentration (µg/ml) | Lower limits | Upper limits | $\chi^2$ | df | Slope | SE slope | Intercept |
|------------------|-----------------------|--------------|--------------|----------|----|-------|----------|-----------|
| LC <sub>50</sub> | 458                   | 276          | 11711        | 24.0     | 6  | 1.37  | 0.224    | -3.64     |

LC: lethal concentration;  $\chi^2$ : chi-square; df: degree of freedom; SE: standard error.

**Table S2.** Mortality percentages of J2 *M. incognita* individuals treated with Cry5\_orf65 solubilized protein crystals.

| Treatment          | Concentration (µg/ml) | Mortality (%)<br>Mean ± SE |
|--------------------|-----------------------|----------------------------|
| Control (HEPES)    | 0                     | 14.5 ± 5.2 a               |
| BMB171-pSTAB-empty | 50                    | 37.7 ± 2.9 a               |
|                    | 150                   | 97.1 ± 2.9 b               |
| BMB171-Cry5_orf65  | 50                    | 50.7 ± 20.4 ab             |
|                    | 150                   | 86.9 ± 2.5 b               |

SE: Standard Error. Different letters were used to denote statistical significance between values. Kruskal-Wallis ( $\chi^2 = 11.552$ , df = 4,  $p = 0.02101$ ), Bonferroni test ( $p$ -value < 0.05).

**Table S3.** Insecticidal protein content of *Bacillus thuringiensis* BMB171.

| Target Database <sup>a</sup>     | Identity (%) <sup>b</sup> | MW (kDa) | Length (No. Residues) |
|----------------------------------|---------------------------|----------|-----------------------|
| CalY                             | 55                        | 22.1     | 197                   |
| <b>Endochitinase</b>             | 99                        | 75.8     | 688                   |
| <b>Bmp1</b>                      | 35                        | 60.9     | 566                   |
| InhA2                            | 99                        | 87.9     | 799                   |
| Sphingomyelin phosphodiesterase  | 99                        | 33       | 294                   |
| DNRLRE domain-containing protein | 100                       | 251.7    | 2253                  |
| CalY                             | 62                        | 21.8     | 197                   |
| CalY                             | 99                        | 20.7     | 189                   |

|                           |     |      |     |
|---------------------------|-----|------|-----|
| InhA1                     | 96  | 86.7 | 796 |
| InhA2                     | 29  | 72.9 | 656 |
| <b>Bmp1</b>               | 97  | 89.4 | 817 |
| InhA3                     | 99  | 76.2 | 692 |
| InhA1                     | 78  | 86.9 | 795 |
| <b>Bmp1</b>               | 61  | 62.4 | 567 |
| Hemolytic enterotoxin HBL | 99  | 52.3 | 466 |
| <b>Bmp1</b>               | 61  | 62.5 | 565 |
| Enhancin_Bel              | 100 | 85.6 | 742 |
| <b>Exochitinase</b>       | 99  | 39.4 | 360 |
| <b>ColB</b>               | 78  | 48.3 | 426 |
| <b>ColB</b>               | 34  | 35.6 | 309 |
| CalY                      | 50  | 22.3 | 201 |
| <b>Bmp1</b>               | 36  | 65.3 | 591 |
| Spp1Aa1                   | 82  | 40.2 | 362 |
| <b>Bmp1</b>               | 32  | 64.6 | 583 |

<sup>a</sup>**Bold**, described toxicity to nematodes. <sup>b</sup>Local alignment using BLASTP.

**Table S4.** Comparative of strains BST-122 and BMB171 secreted factors.

| Target Database <sup>a</sup>    | BST-122                 |          | BMB171                  |          |
|---------------------------------|-------------------------|----------|-------------------------|----------|
|                                 | % Identity <sup>b</sup> | MW (kDa) | % Identity <sup>b</sup> | MW (kDa) |
| <b>Bmp1</b>                     | 36                      | 65.3     | 97                      | 89.4     |
| <b>ColB</b>                     | 78                      | 48.3     | 78                      | 48.3     |
| <b>Endochitinase</b>            | -                       | -        | 99                      | 75.8     |
| <b>Exochitinase</b>             | 99                      | 39.4     | 99                      | 39.4     |
| CalY                            | 56                      | 22       | 99                      | 20.7     |
| InhA1                           | 96                      | 86.7     | 96                      | 86.7     |
| InhA2                           | 99                      | 87.9     | 99                      | 87.9     |
| InhA3                           | -                       | -        | 99                      | 76.2     |
| Enhancin_Bel                    | 99                      | 85.5     | 100                     | 85.6     |
| Sphingomyelin phosphodiesterase | 100                     | 37.0     | 99                      | 33.0     |

<sup>a</sup>**Bold**, described toxicity to nematodes. <sup>b</sup>Local alignment using BLASTP.

**Table S5.** Primers used in this study.

| Primers              | Sequences (5'-3') <sup>a</sup> |
|----------------------|--------------------------------|
| For gene cloning     |                                |
| Cry5Ad-like_NcoI_FW  | CCCATGGCCAAATGATTGCATATCTTGATT |
| Orf2_Cry65_Eco52I_RV | CCCGGCCGCTCCGCGTGTATTCTTATA    |
| For gene sequencing  |                                |
| Cry5As-like-seq-FW   | CATTACAGCAATTGCACACC           |
| Cry5As-like-seq-RV   | CCAGTAACAACAAAGCTGC            |

<sup>a</sup>*Italic*, restriction enzyme site included in the primer sequence.
